# Supplementary material for: Draft genome sequence of the Tibetan medicinal herb Rhodiola crenulata
Source: PubMed Central journal article supplement (PMC5530320; doi:10.1093/gigascience/gix033), 2017-05-05
Supplement: gix033_Additional_file_3_In-house_Perl_Script.pdf [file gix033_Additional_file_3_In-house_Perl_Script.pdf]

```

use strict;
use warnings;

die "perl $0 <kmer.xls> <k> <kmer_num> <expect_peak:default is the most high
peak>\nplease see the example before you use this script\n" if(@ARGV==0);

# global variables
my $REPEAT = 1.6;
my @kmers;
my $size;
my @peaks;
my $kmer_depth;
my $repeat;
my $hete;
my $read_coverage;
my $error_rate;
my $kmer_error;

my($data,$k,$kmer_num,$manual_peak) = @ARGV;
@peaks = getPeaks($data);
my($c1,$p1,$n1) = &getFirstLine($data);

foreach my $peak(@peaks){
    print "\n*****\n";
    $kmer_depth = $peak;
    $size = &sizeGuess();
    $repeat = &repeatGuess($kmer_num,$kmer_depth,$size);
    $hete = &heteGuess();
    &debug();
}

$manual_peak||=$kmer_depth;
if($manual_peak!=$kmer_depth){
    print "\n-----manual set-----\n";
    $kmer_depth = $manual_peak;
    $size = &getSize1($kmer_num,$kmer_depth);
    $repeat = &repeatGuess($kmer_num,$kmer_depth,$size);
    $hete = &heteGuess();
    &debug();
}
##### sub routine #####
sub debug{
    print "peak:$kmer_depth\n";
    print "genomeSize:$size\n";
}

```

```

    print "repeat:$repeat\n";
    print "hete:$hete\n";
}
sub sizeGuess{
    my $size = &getSize1($kmer_num,$kmer_depth);
    return $size;
}
sub repeatGuess{
    my($kmer_total,$kmer_depth,$size)=@_;
    my $num_unique = 0;
    for(my $i=0;$i<$REPEAT*$kmer_depth;$i++){
        my($count,$percent,$num) = split(/\t/,$kmers[$i]);
        $num_unique += $count*$num;
    }
    my $repeat = ($kmer_total - $num_unique)/$kmer_depth/$size;
    $repeat = $repeat/0.986;
    return $repeat;
}
sub heteGuess1{
    my $inflex = inflexion();
    $inflex = 2 if($inflex>=0.5*$kmer_depth);
    my $max = $REPEAT*$kmer_depth;
    my $kmer_uni = 0;
    for(my $i=$inflex+1;$i<$max;$i++){
        my($count,$percent,$num) = split(/\t/,$kmers[$i]);
        $kmer_uni += $num;
    }
    my($count,$percent,$num_peak) = split(/\t/,$kmers[$kmer_depth]);
    my $kmer_org = $size*(1-$repeat); # unique kmers
    my $possession = getPossion($kmer_depth,$kmer_depth);
    my $result = 1-($num_peak/$kmer_org/$possession)**(1/$k);
    return $result;
}

sub heteGuess{
    my $inflex = inflexion();
    $inflex = 2 if($inflex>=0.5*$kmer_depth);
    my $max = $REPEAT*$kmer_depth;
    my $kmer_uni = 0;
    for(my $i=$inflex+1;$i<$max;$i++){
        my($count,$percent,$num) = split(/\t/,$kmers[$i]);
        $kmer_uni += $num;
    }
    my($count,$percent,$num_peak) = split(/\t/,$kmers[$kmer_depth]);

```

```

my $kmer_org = $size*(1-$repeat); # unique kmers
my $add_percent = ($kmer_uni-$kmer_org)/$kmer_org;#
my $result = 1-(1-$add_percent)**(1/$k);
$result = 0 if($result<=0);
return $result;
}

sub getPeaks{
my $CUT = 0.0005;
my($file) = @_;
open FI,"$file" or die $!;
my @peaks;
while(my $line=<FI>){
    chomp $line;
    my($count,$percent,$num) = split(/\t/,$line);
    push(@kmers,"$count\t$percent\t$num");
}
close FI;

for(my $i = 1;$i<$#kmers-1;$i++){
    my($count1,$percent1,$num1) = split(/\t/,$kmers[$i-1]);
    my($count2,$percent2,$num2) = split(/\t/,$kmers[$i]);
    my($count3,$percent3,$num3) = split(/\t/,$kmers[$i+1]);
    push(@peaks,$count2) if($percent2>$percent1 && $percent2>$percent3 &&
$percent2>$CUT);
}
return @peaks;
}

sub getFirstLine{
my($file) = @_;
open FI,"$file" or die $!;
my $line = <FI>;
chomp $line;
my @array = split(/\t/,$line);
close FI;
return @array;
}

sub inflexion{
my $num_err = 0;
for(my $i = 1;$i<$#kmers-1;$i++){
    my($count1,$percent1,$num1) = split(/\t/,$kmers[$i-1]);
    my($count2,$percent2,$num2) = split(/\t/,$kmers[$i]);

```

```

        my($count3,$percent3,$num3) = split(/\t/,$kmers[$i+1]);
        return $count2 if($percent2<$percent1 && $percent2<$percent3);
    }
    return 2;
}

```

```

sub getSize1{
    my $inflexion = &inflexion();
    my($kmer_num,$kmer_exp) = @_;
    $inflexion = 2 if($inflexion>=0.5*$kmer_exp);
    # get the error kmer number
    my $kmer_e =0;
    for(my $i=0;$i<=$inflexion;$i++){
        my($count,$percent,$num) = split(/\t/,$kmers[$i]);
        $kmer_e += $count*$num;
    }
    $kmer_error = $kmer_e;
    my $kmer_cor = $kmer_num-$kmer_e;
    my $size = int($kmer_cor/$kmer_exp);
    return $size;
}

```
