# Supplementary material for: Draft genome sequence of the Tibetan medicinal herb Rhodiola crenulata
Source: PubMed Central journal article supplement (PMC5530320; doi:10.1093/gigascience/gix033), 2017-05-05
Supplement: gix033_GIGA-D-16-00153_Original_Submission.pdf [file gix033_GIGA-D-16-00153_Original_Submission.pdf]

## Draft genome of the Tibetan medicinal herb, *Rhodiola crenulata*

1  
2  
3 Yuanyuan Fu<sup>1,2,3</sup>, Liangwei Li<sup>2,3</sup>, Shijie Hao<sup>2</sup>, Rui Guan<sup>2,3</sup>, Guangyi Fan<sup>2,3,4</sup>,  
4  
5 Chengcheng Shi<sup>2</sup>, Haibo Wan<sup>2,3</sup>, Wenbin Chen<sup>2</sup>, He Zhang<sup>2,3</sup>, Guocheng Liu<sup>2</sup>, Jihua  
6  
7 Wang<sup>5</sup>, Lulin Ma<sup>5</sup>, Jianling You<sup>6</sup>, Xuemei Ni<sup>2</sup>, Zhen Yue<sup>2</sup>, Xun Xu<sup>2</sup>, Xiao Sun<sup>1†</sup>, Xin  
8  
9 Liu<sup>2†</sup>, Simon Ming-Yuen Lee<sup>4†</sup>.

10  
11  
12  
13 <sup>1</sup>State Key Laboratory of Bioelectronics, School of Biological Sciences and Medical  
14  
15 Engineering, Southeast University, Nanjing 210096, China.

16  
17  
18  
19 <sup>2</sup>BGI-Shenzhen, Shenzhen 518083, China.

20  
21  
22 <sup>3</sup>BGI-Qingdao, Qingdao 266555, China.

23  
24  
25 <sup>4</sup>State Key Laboratory of Quality Research in Chinese Medicine, Institute of Chinese  
26  
27 Medical Sciences, University of Macau, Macao, China.

28  
29  
30 <sup>5</sup>Flower Research Institute of Yunnan Academy of Agricultural Sciences, National  
31  
32 Engineering Research Center For Ornamental Horticulture, Kunming, 650205, China.

33  
34  
35  
36 <sup>6</sup>The Ministry of Education Key Laboratory for Biodiversity Science and Ecological  
37  
38 Engineering, Institute of Biodiversity Science, Institute of Botany, Fudan University,  
39  
40 Shanghai, 200438, China

41  
42  
43  
44 †Correspondence authors: Simon Ming-Yuen Lee ([simonlee@umac.mo](mailto:simonlee@umac.mo)), Xin Liu  
45  
46 ([liuxin@genomics.cn](mailto:liuxin@genomics.cn)), and Xiao Sun ([xsun@seu.edu.cn](mailto:xsun@seu.edu.cn))  
47  
48  
49  
50  
51

## 52 53 Abstract

## 54 55 Background

56  
57  
58 *Rhodiola crenulata*, one of the well-known Tibetan medicinal herb, is mainly grown in  
59  
60  
61  
62  
63  
64  
65

1 high-altitude regions of Tibet, Yunnan and Sichuan provinces in China. In the past few  
2  
3 years, increasing published studies on pharmacological activities of *R. crenulata*, have  
4  
5 strengthened our understanding into its active ingredient composition, pharmacological  
6  
7 activity and mechanism of action. The findings also provided strong evidences  
8  
9 supporting the important medicinal and economical values of *R. crenulata*. Meanwhile,  
10  
11 some *Rhodiola* species are becoming endangered because of overexploitation and  
12  
13 environmental destruction. However, little is known about the genetic and genomic  
14  
15 information of any *Rhodiola* species.  
16  
17  
18  
19  
20  
21

## 22 **Findings**

23 Here, we reported the first draft assembly of *R. crenulata* genome, which was 344.5  
24  
25 Mb (25.7Mb Ns), accounting for 82% of the estimated genome size, with the scaffold  
26  
27 N50 length of 144.7 kb and the contig N50 length of 25.4 kb. The *R. crenulata* genome  
28  
29 was not only highly heterozygous but also highly repetitive with ratios of 1.12% and  
30  
31 66.15%, respectively, based on the *k*-mer analysis. Furthermore, 226.6 Mb transposable  
32  
33 elements were detected, of which 77.03% were long terminal repeats. In total, 31,517  
34  
35 protein-coding genes were identified, capturing 86.72% of expected plant genes in  
36  
37 BUSCO. Additionally, 79.73% of protein-coding genes were functionally annotated.  
38  
39  
40  
41  
42  
43  
44  
45  
46  
47

## 48 **Conclusions**

49 *R. crenulata* is an important medicinal plant and also a potentially interesting model  
50  
51 species for studying the adaptability of *Rhodiola* species to extreme environments. The  
52  
53 genomic sequences of *R. crenulata* would be useful for understanding the evolutionary  
54  
55 mechanism of stress resistance gene and biosynthesis pathways of the different  
56  
57  
58  
59  
60  
61  
62  
63  
64  
65

1 medicinal ingredients for example, salidroside, in *R. crenulata*.  
2  
3  
4  
5

## 6 **Keywords:**

7  
8  
9 *Rhodiola crenulata*, Genomics, Assembly, Annotation  
10  
11  
12  
13

## 14 **Data description**

## 15 **Background information**

16  
17  
18 Genus *Rhodiola* in the family *Crassulaceae*, a perennial herbaceous flowering plant, is  
19  
20  
21  
22  
23  
24  
25  
26  
27  
28  
29  
30  
31  
32  
33  
34  
35  
36  
37  
38  
39  
40  
41  
42  
43  
44  
45  
46  
47  
48  
49  
50  
51  
52  
53  
54  
55  
56  
57  
58  
59  
60  
61  
62  
63  
64  
65  
66  
67  
68  
69  
70  
71  
72  
73  
74  
75  
76  
77  
78  
79  
80  
81  
82  
83  
84  
85  
86  
87  
88  
89  
90  
91  
92  
93  
94  
95  
96  
97  
98  
99  
100  
101  
102  
103  
104  
105  
106  
107  
108  
109  
110  
111  
112  
113  
114  
115  
116  
117  
118  
119  
120  
121  
122  
123  
124  
125  
126  
127  
128  
129  
130  
131  
132  
133  
134  
135  
136  
137  
138  
139  
140  
141  
142  
143  
144  
145  
146  
147  
148  
149  
150  
151  
152  
153  
154  
155  
156  
157  
158  
159  
160  
161  
162  
163  
164  
165  
166  
167  
168  
169  
170  
171  
172  
173  
174  
175  
176  
177  
178  
179  
180  
181  
182  
183  
184  
185  
186  
187  
188  
189  
190  
191  
192  
193  
194  
195  
196  
197  
198  
199  
200  
201  
202  
203  
204  
205  
206  
207  
208  
209  
210  
211  
212  
213  
214  
215  
216  
217  
218  
219  
220  
221  
222  
223  
224  
225  
226  
227  
228  
229  
230  
231  
232  
233  
234  
235  
236  
237  
238  
239  
240  
241  
242  
243  
244  
245  
246  
247  
248  
249  
250  
251  
252  
253  
254  
255  
256  
257  
258  
259  
260  
261  
262  
263  
264  
265  
266  
267  
268  
269  
270  
271  
272  
273  
274  
275  
276  
277  
278  
279  
280  
281  
282  
283  
284  
285  
286  
287  
288  
289  
290  
291  
292  
293  
294  
295  
296  
297  
298  
299  
300  
301  
302  
303  
304  
305  
306  
307  
308  
309  
310  
311  
312  
313  
314  
315  
316  
317  
318  
319  
320  
321  
322  
323  
324  
325  
326  
327  
328  
329  
330  
331  
332  
333  
334  
335  
336  
337  
338  
339  
340  
341  
342  
343  
344  
345  
346  
347  
348  
349  
350  
351  
352  
353  
354  
355  
356  
357  
358  
359  
360  
361  
362  
363  
364  
365  
366  
367  
368  
369  
370  
371  
372  
373  
374  
375  
376  
377  
378  
379  
380  
381  
382  
383  
384  
385  
386  
387  
388  
389  
390  
391  
392  
393  
394  
395  
396  
397  
398  
399  
400  
401  
402  
403  
404  
405  
406  
407  
408  
409  
410  
411  
412  
413  
414  
415  
416  
417  
418  
419  
420  
421  
422  
423  
424  
425  
426  
427  
428  
429  
430  
431  
432  
433  
434  
435  
436  
437  
438  
439  
440  
441  
442  
443  
444  
445  
446  
447  
448  
449  
450  
451  
452  
453  
454  
455  
456  
457  
458  
459  
460  
461  
462  
463  
464  
465  
466  
467  
468  
469  
470  
471  
472  
473  
474  
475  
476  
477  
478  
479  
480  
481  
482  
483  
484  
485  
486  
487  
488  
489  
490  
491  
492  
493  
494  
495  
496  
497  
498  
499  
500  
501  
502  
503  
504  
505  
506  
507  
508  
509  
510  
511  
512  
513  
514  
515  
516  
517  
518  
519  
520  
521  
522  
523  
524  
525  
526  
527  
528  
529  
530  
531  
532  
533  
534  
535  
536  
537  
538  
539  
540  
541  
542  
543  
544  
545  
546  
547  
548  
549  
550  
551  
552  
553  
554  
555  
556  
557  
558  
559  
560  
561  
562  
563  
564  
565  
566  
567  
568  
569  
570  
571  
572  
573  
574  
575  
576  
577  
578  
579  
580  
581  
582  
583  
584  
585  
586  
587  
588  
589  
590  
591  
592  
593  
594  
595  
596  
597  
598  
599  
600  
601  
602  
603  
604  
605  
606  
607  
608  
609  
610  
611  
612  
613  
614  
615  
616  
617  
618  
619  
620  
621  
622  
623  
624  
625  
626  
627  
628  
629  
630  
631  
632  
633  
634  
635  
636  
637  
638  
639  
640  
641  
642  
643  
644  
645  
646  
647  
648  
649  
650  
651  
652  
653  
654  
655  
656  
657  
658  
659  
660  
661  
662  
663  
664  
665  
666  
667  
668  
669  
670  
671  
672  
673  
674  
675  
676  
677  
678  
679  
680  
681  
682  
683  
684  
685  
686  
687  
688  
689  
690  
691  
692  
693  
694  
695  
696  
697  
698  
699  
700  
701  
702  
703  
704  
705  
706  
707  
708  
709  
710  
711  
712  
713  
714  
715  
716  
717  
718  
719  
720  
721  
722  
723  
724  
725  
726  
727  
728  
729  
730  
731  
732  
733  
734  
735  
736  
737  
738  
739  
740  
741  
742  
743  
744  
745  
746  
747  
748  
749  
750  
751  
752  
753  
754  
755  
756  
757  
758  
759  
760  
761  
762  
763  
764  
765  
766  
767  
768  
769  
770  
771  
772  
773  
774  
775  
776  
777  
778  
779  
780  
781  
782  
783  
784  
785  
786  
787  
788  
789  
790  
791  
792  
793  
794  
795  
796  
797  
798  
799  
800  
801  
802  
803  
804  
805  
806  
807  
808  
809  
810  
811  
812  
813  
814  
815  
816  
817  
818  
819  
820  
821  
822  
823  
824  
825  
826  
827  
828  
829  
830  
831  
832  
833  
834  
835  
836  
837  
838  
839  
840  
841  
842  
843  
844  
845  
846  
847  
848  
849  
850  
851  
852  
853  
854  
855  
856  
857  
858  
859  
860  
861  
862  
863  
864  
865  
866  
867  
868  
869  
870  
871  
872  
873  
874  
875  
876  
877  
878  
879  
880  
881  
882  
883  
884  
885  
886  
887  
888  
889  
890  
891  
892  
893  
894  
895  
896  
897  
898  
899  
900  
901  
902  
903  
904  
905  
906  
907  
908  
909  
910  
911  
912  
913  
914  
915  
916  
917  
918  
919  
920  
921  
922  
923  
924  
925  
926  
927  
928  
929  
930  
931  
932  
933  
934  
935  
936  
937  
938  
939  
940  
941  
942  
943  
944  
945  
946  
947  
948  
949  
950  
951  
952  
953  
954  
955  
956  
957  
958  
959  
960  
961  
962  
963  
964  
965  
966  
967  
968  
969  
970  
971  
972  
973  
974  
975  
976  
977  
978  
979  
980  
981  
982  
983  
984  
985  
986  
987  
988  
989  
990  
991  
992  
993  
994  
995  
996  
997  
998  
999  
1000

## Sample collection and Sequencing

According to the *protocol 1* (**Additional file 2**), genomic DNA was isolated from the leaf tissue of a single male *R. crenulata* (**Fig. 1**; NCBI taxonomy ID: 242839), which was collected from Shangri-La, located in the northwest of Yunnan province, China.

Subsequently, three paired-end libraries with insert size 250 bp, 500 bp, 800 bp and three mate-pair libraries (5 kb, 10 kb, 20 kb) were constructed with the standard protocol provided by Illumina (San Diego, USA) and sequenced on an Illumina HiSeq 2000/4000 platform using a whole genome shotgun sequencing (WGS) strategy. A total of 162.08 Gb (~380X) raw sequence reads were generated (**Additional file 1: Table S1**). To reduce the effect of sequencing errors to the assembly, SOAPfilter (Version 2.2), a package from SOAPdenovo2 [7], was used to filter reads with adapters, low quality, undersize insert size and PCR duplication with parameters ‘-y -z -p -M 2’. Finally, 123.47 Gb (~290X) clean data were obtained (**Additional file 1: Table S1**).

RNA were extracted from the root, stem and leaf tissues, respectively, of a single male *R. crenulata*, which was collected from the Jade Dragon Snow Mountain, located at the northwest of Yunnan province, China, according to the *protocol 2* (**Additional file 2**).

Single-end libraries were constructed subsequently using standard protocol provided by BGI (BGI-Shenzhen) and then sequenced on the BGISEQ-500 platform. Totally, 13.54 Gb raw data was obtained, and after filtering by SOAPnuke (Version 1.5.6) (<https://github.com/BGI-flexlab/SOAPnuke>) with parameters “-l 10 -q 0.5 -n 0.01 -f AGTCGGAGGCCAAGCGGTCTTAGGAAGACAA -Q 2”, we finally got 13.23 Gb high-quality clean data (**Additional file 1: Table S2**).

## Assembly

1  
2  
3 Firstly, the genome size, 420.2 Mb, was estimated based on the 17-mer analysis [8]  
4  
5  
6 using 34.4 Gb clean data from 250 bp-insert library, as well as the repetitive and  
7  
8  
9 heterozygous ratio with 66.15% and 1.12%, respectively (**Additional file 1: Table S3;**  
10  
11  
12 **Fig. S1**). Given the high heterozygosity, Platanus (Version 1.2.4) [9], which is efficient  
13  
14 for the assembly of highly heterozygous genomes, was used to assemble the genome  
15  
16 by performing “assemble, scaffold, gap\_close” modes orderly with “k=35”. As a result,  
17  
18 345.1 Mb (containing 65.9 Mb Ns) draft assembly with the contig N50 length of 6.3 kb  
19  
20  
21 and the scaffold N50 length of 145.1 kb was generated (**Additional file 1: Table S4**).  
22  
23  
24 To further improve the quality of our assembly genome, GapCloser (Version 1.10) [7]  
25  
26 was implemented with all of six libraries data. Finally, we got the 344.5 Mb (containing  
27  
28 25.7 Mb Ns) of assembly genome, representing for 82% of the estimated genome size,  
29  
30  
31 with the contig and scaffold N50 length of 25.4 kb and 144.7 kb, respectively (**Table**  
32  
33  
34 **1**). Meanwhile, we also ran other prevalent *de novo* assemblers, such as SOAPdenovo2  
35  
36  
37 [7], ABySS (Version 1.9.0) [10] with various modifications of parameters. But the  
38  
39  
40 results based on these assemblers were not better (**Additional file 1: Table S4**). More  
41  
42  
43 methodological information is available in the *protocol 3* (**Additional file 2**).  
44  
45  
46  
47  
48  
49

**Table 1.** Statistics of the final assembly using Platanus and Gapcloser.

| Type              | Scaffold    | Contig      |
|-------------------|-------------|-------------|
| Total number      | 150,003     | 161,878     |
| Total length (bp) | 344,513,827 | 318,807,120 |
| N50 length (bp)   | 144,749     | 25,360      |
| N90 length (bp)   | 1,003       | 877         |

|                 |           |         |
|-----------------|-----------|---------|
| Max length (bp) | 1,309,315 | 300,573 |
| GC content (%)  | 39.68     | 39.68   |

---

## Repeat annotation and gene prediction

A combination of *de novo* and homolog-based methods were conducted to identify the transposable elements (TEs) and predict the protein-coding genes in *R. crenulata* genome according to the *protocol 3* (**Additional file 2**), which was also illustrated in

### Fig. 2.

Briefly, in terms of the repeats detection, firstly, RepeatScout (Version 1.0.5) [11], LTR-FINDER (Version 1.0.5) [12] and RepeatModeler (Version 1.0.5) [13] were used to build *de novo* library on the basis of our genome sequences and then by using the library as database, RepeatMasker (Version 3.3.0) [13] was utilized to classify the types of repetitive sequences (**Additional file 1: Table S5**). On the other hand, TEs in DNA and protein levels were identified by aligning genome sequences against Repbase TE library (Version 17.01) [14, 15] and TE protein database with RepeatMasker and RepeatProteinMask (Version 3.3.0) [13] (**Additional file 1: Table S6**). Overall, 226.6 Mb of TEs (65.77% of the assembly) were detected, containing 174.6 Mb (50.67% of the assembly) LTR (**Fig. 3a; Additional file 1: Table S6**).

Before gene prediction, TEs observed above were masked to reduce the interference.

Regarding the *de novo* gene prediction, Augustus (Version 2.5.5) [16, 17] and GlimmerHMM (Version 3.0.1) [18] were conducted with Arabidopsis training set, and 31,005 and 34,586 protein-coding genes were predicted, respectively (**Fig. 3b; Additional file 1: Table S7**). With respect to the homolog-based methods, because of

1 the lack of accessible genome sequences in family *Crassulaceae*, we downloaded the  
2  
3 protein sequences of model organism *Arabidopsis thaliana*  
4  
5 (<https://www.ncbi.nlm.nih.gov/genome/?term=Arabidopsis+thaliana>) and relatively  
6  
7 close-related species – *Fragaria vesca*  
8  
9 ([https://www.ncbi.nlm.nih.gov/genome/3314?genome\\_assembly\\_id=34435](https://www.ncbi.nlm.nih.gov/genome/3314?genome_assembly_id=34435)), *Prunus*  
10  
11 *mume* ([https://www.ncbi.nlm.nih.gov/genome/13911?genome\\_assembly\\_id=44389](https://www.ncbi.nlm.nih.gov/genome/13911?genome_assembly_id=44389)  
12  
13 ) and *Prunus persica*  
14  
15 ([https://www.ncbi.nlm.nih.gov/genome/388?genome\\_assembly\\_id=28754](https://www.ncbi.nlm.nih.gov/genome/388?genome_assembly_id=28754)) in *rosids*,  
16  
17 and then aligned these against the repeat-masked genome using BLAT [19]. GeneWise  
18  
19 (Version 2.2.0) [20], whose algorithm was derived from a principled combination of  
20  
21 hidden Markov models, was subsequently used to merge these mapping results and  
22  
23 predict gene structures, resulting in 36,495, 27,034, 28,767 and 25,976 protein-coding  
24  
25 genes, respectively. In addition, each average length of CDS, exon and intron predicted  
26  
27 in different methods were similar (**Fig. 3b; Additional file 1: Table S7**). Then we  
28  
29 performed GLEAN [21] to integrate genes predicted above and got a non-redundant  
30  
31 gene set, containing 28,981 protein-coding genes. Also, we discarded those genes with  
32  
33 overlapping ratio less than 0.8 when comparing with homolog-based evidence. 27,107  
34  
35 genes were remained. Additionally, to further improve the credibility, sequenced  
36  
37 transcriptomes data from three *R. crenulata* tissues were mapped to the consensus gene  
38  
39 set by TopHat (Version 2.1.0) [22], and then Cufflinks (Version 2.2.1) [23] was  
40  
41 executed to assemble and merge transcripts based on the mapping results. Finally, the  
42  
43 gene set with 31,517 protein-coding genes was generated, of which 79.73% genes can  
44  
45  
46  
47  
48  
49  
50  
51  
52  
53  
54  
55  
56  
57  
58  
59  
60  
61  
62  
63  
64  
65

1 be functional annotation with SWISS-PROT [24], TrEMBL [24] and KEGG [25, 26]  
2  
3 databases, and using InterProScan (Version 4.7) [27, 28] (**Additional file 1: Table S8**).  
4  
5

## 6 **Completeness of the gene set and assembly**

7

8  
9 To evaluate the completeness of the gene set and assembly, BUSCO [29] was  
10  
11 performed with “-OGS” and “-genome” modes, respectively. The results showed that  
12  
13 86.72% of reference genes were captured as complete single-copy BUSCOs when  
14  
15 searching our gene set; meanwhile, regarding the assembly, 91.63% of the 956 expected  
16  
17 plant genes were detected as complete (**Table 2**). Additionally, RNA sequence reads  
18  
19 were mapped to our genome assembly by TopHat (Version 2.1.0) [22] and the average  
20  
21 mapping ratio was almost 81.5% (**Additional file 1: Table S9**).  
22  
23  
24  
25  
26  
27  
28

29 **Table 2.** Statistics of the BUSCO assessment.  
30

| Types of BUSCOs             | Gene set |                | Assembly |                |
|-----------------------------|----------|----------------|----------|----------------|
|                             | Number   | Percentage (%) | Number   | Percentage (%) |
| Complete Single-copy BUSCOs | 829      | 86.72          | 876      | 91.63          |
| Fragmented BUSCOs           | 37       | 3.87           | 35       | 3.66           |
| Missing BUSCOs              | 90       | 9.41           | 45       | 4.71           |
| Total BUSCO groups searched | 956      | 100            | 956      | 100            |

31  
32  
33  
34  
35  
36  
37  
38  
39  
40  
41  
42  
43  
44  
45  
46  
47  
48  
49  
50  
51  
52 In summary, the *R. crenulata* genome that we have sequenced, assembled and  
53  
54 annotated here, was the first one in the Genus *Rhodiola*, and even in the family  
55  
56 *Crassulaceae*. The *R. crenulata* genome would serve as an important resource for  
57  
58  
59  
60  
61  
62  
63  
64  
65



1 comparative genomic study and also further investigation of the adaptability of  
2  
3 *Rhodiola* species in extreme environment and the biosynthesis pathways of  
4  
5 pharmacologically active metabolites in *Rhodiola* species.  
6  
7  
8  
9  
10

## 11 **Figure legends**

12 **Figure 1. Example of *R. crenulata* (image from Shifeng Li).**

13  
14 **Figure 2. An overview of the annotation workflow.** The workflow begins with  
15 assembled genomic sequences, and it produces results of the repeat annotation, protein-  
16 coding gene prediction and functional annotation. (a) Repeat annotation. Repeats in the  
17 genome are detected in two different methods: *de novo* and homolog-based. In the *de*  
18 *novi* methods, RepeatScout, LTR-FINDER and RepeatModeler are used to build *de*  
19 *novi* repeat libraries and further classified by RepeatMasker; In the homolog-based  
20 methods, RepeatMasker and RepeatProteinMask are performed to search TEs by  
21 aligning sequences against existed libraries. (b) Gene prediction. Before the gene  
22 prediction, TEs are totally masked. Augustus and GlimmerHMM are used to perform  
23 *de novo* prediction; BLAT and GeneWise are executed to predict gene models based on  
24 the homologous protein sequences. (c) GLEAN is performed to obtain consensus gene  
25 set. (d) In combination with the clean RNA sequenced reads, a more comprehensive  
26 gene set is integrated finally. (e) Estimation of the completeness of gene set by using  
27 BUSCO. (f) Functional annotation.

28  
29 **Figure3. Summary statistics of the repeats and gene models.** (a) The lengths of  
30 different types of TEs and proportions in genome. LTR is the most predominant  
31  
32  
33  
34  
35  
36  
37  
38  
39  
40  
41  
42  
43  
44  
45  
46  
47  
48  
49  
50  
51  
52  
53  
54  
55  
56  
57  
58  
59  
60  
61  
62  
63  
64  
65

1 elements. (b) The numbers of predicted genes and average lengths of CDS, exon and  
2  
3  
4 intron predicted in different methods. The green, blue and purple bars represent the  
5  
6 CDS, exon and intron, respectively. The gene numbers in each *de novo* or homolog-  
7  
8 based method are listed in parentheses.  
9

## 10 11 12 13 14 **Availability of supporting data**

15  
16  
17 The DNA sequencing data have been deposited into NCBI Sequence Read Archive  
18  
19 (SRA) under ID SRA538315. The RNA sequencing data are under ID SRA539059.  
20  
21

22  
23 Supporting data are available at *GigaDB*: [ftp://gigadb\\_private2@climb.genomics.cn](ftp://gigadb_private2@climb.genomics.cn).  
24

## 25 26 **Abbreviations**

27  
28 bp: base pair, kb: kilo base, Mb: mega base, Gb: giga base, CDS: coding sequence  
29  
30

## 31 32 **Additional files**

33  
34 **Additional file 1:** Supplementary Tables and Figures.docx  
35

36  
37 **Additional file 2:** Protocols.io.xls  
38

## 39 40 **Acknowledgements**

41  
42 This work was supported by the National High Technology Research and Development  
43  
44 Program of China (NO.2014AA10A602-4) and Basic Research Program Support by  
45  
46 Shenzhen Municipal Government (NO. JCYJ20150831201123287).  
47  
48  
49

## 50 51 **Competing interests**

52  
53 The authors declare that they have no competing interests.  
54  
55

## 56 57 **Authors' contributions**

58  
59 S. M.Y.L, X.L, X.S and X.X designed the project. Y.F, L.L, S.H, R.G, G.F, H.W, W.C,  
60  
61  
62  
63  
64  
65

1 H.Z analyzed the data. Y.F, S.M.Y.L, X.L, G.F, C.S wrote the manuscript. G.L, J.W,  
2  
3 L.M, J.Y, X.N, Z.Y prepared the samples and conducted the experiments.  
4  
5

## 6 **References**

- 7  
8  
9 1. Recio MC, Giner RM, Manez S. Immunomodulatory and Antiproliferative Properties  
10 of Rhodiola Species. *Planta medica*. 2016;82(11-12):952-60. doi:10.1055/s-0042-  
11 107254.  
12
- 13 2. Zhu C, Guan F, Wang C, Jin LH. The protective effects of Rhodiola crenulata extracts  
14 on *Drosophila melanogaster* gut immunity induced by bacteria and SDS toxicity.  
15 *Phytotherapy research : PTR*. 2014;28(12):1861-6. doi:10.1002/ptr.5215.  
16  
17
- 18 3. Bassa LM, Jacobs C, Gregory K, Henchey E, Ser-Dolansky J, Schneider SS.  
19 Rhodiola crenulata induces an early estrogenic response and reduces proliferation and  
20 tumorsphere formation over time in MCF7 breast cancer cells. *Phytomedicine :  
21 international journal of phytotherapy and phytopharmacology*. 2016;23(1):87-94.  
22 doi:10.1016/j.phymed.2015.11.014.  
23  
24
- 25 4. Dudek MC, Wong KE, Bassa LM, Mora MC, Ser-Dolansky J, Henneberry JM et al.  
26 Antineoplastic effects of Rhodiola crenulata treatment on B16-F10 melanoma. *Tumour  
27 biology : the journal of the International Society for Oncodevelopmental Biology and  
28 Medicine*. 2015;36(12):9795-805. doi:10.1007/s13277-015-3742-2.  
29  
30
- 31 5. Cai Z, Li W, Wang H, Yan W, Zhou Y, Wang G et al. Antitumor effects of a purified  
32 polysaccharide from Rhodiola rosea and its action mechanism. *Carbohydrate polymers*.  
33 2012;90(1):296-300. doi:10.1016/j.carbpol.2012.05.039.  
34  
35
- 36 6. Panossian A, Wikman G, Sarris J. Rosenroot (*Rhodiola rosea*): traditional use,  
37 chemical composition, pharmacology and clinical efficacy. *Phytomedicine :  
38 international journal of phytotherapy and phytopharmacology*. 2010;17(7):481-93.  
39 doi:10.1016/j.phymed.2010.02.002.  
40  
41
- 42 7. Luo R, Liu B, Xie Y, Li Z, Huang W, Yuan J et al. SOAPdenovo2: an empirically  
43 improved memory-efficient short-read de novo assembler. *GigaScience*. 2012;1(1):18.  
44 doi:10.1186/2047-217X-1-18.  
45  
46
- 47 8. Li R, Fan W, Tian G, Zhu H, He L, Cai J et al. The sequence and de novo assembly  
48 of the giant panda genome. *Nature*. 2010;463(7279):311-7. doi:10.1038/nature08696.  
49  
50
- 51 9. Kajitani R, Toshimoto K, Noguchi H, Toyoda A, Ogura Y, Okuno M et al. Efficient  
52  
53  
54  
55  
56  
57  
58  
59  
60  
61  
62  
63  
64  
65

1 de novo assembly of highly heterozygous genomes from whole-genome shotgun short  
2 reads. *Genome research*. 2014;24(8):1384-95. doi:10.1101/gr.170720.113.

3  
4 10. Simpson JT, Wong K, Jackman SD, Schein JE, Jones SJ, Birol I. ABySS: a parallel  
5 assembler for short read sequence data. *Genome research*. 2009;19(6):1117-23.  
6 doi:10.1101/gr.089532.108.

7  
8  
9 11. Price AL, Jones NC, Pevzner PA. De novo identification of repeat families in large  
10 genomes. *Bioinformatics*. 2005;21 Suppl 1:i351-8. doi:10.1093/bioinformatics/bti1018.

11  
12 12. Xu Z, Wang H. LTR\_FINDER: an efficient tool for the prediction of full-length  
13 LTR retrotransposons. *Nucleic acids research*. 2007;35(Web Server issue):W265-8.  
14 doi:10.1093/nar/gkm286.

15  
16  
17 13. Tarailo-Graovac M, Chen N. Using RepeatMasker to identify repetitive elements in  
18 genomic sequences. *Current protocols in bioinformatics*. 2009;Chapter 4:Unit 4 10.  
19 doi:10.1002/0471250953.bi0410s25.

20  
21  
22 14. Bao W, Kojima KK, Kohany O. Repbase Update, a database of repetitive elements  
23 in eukaryotic genomes. *Mobile DNA*. 2015;6:11. doi:10.1186/s13100-015-0041-9.

24  
25  
26 15. Jurka J, Kapitonov VV, Pavlicek A, Klonowski P, Kohany O, Walichiewicz J.  
27 Repbase Update, a database of eukaryotic repetitive elements. *Cytogenetic and genome  
28 research*. 2005;110(1-4):462-7. doi:10.1159/000084979.

29  
30  
31 16. Stanke M, Keller O, Gunduz I, Hayes A, Waack S, Morgenstern B. AUGUSTUS:  
32 ab initio prediction of alternative transcripts. *Nucleic acids research*. 2006;34(Web  
33 Server issue):W435-9. doi:10.1093/nar/gkl200.

34  
35  
36 17. Keller O, Kollmar M, Stanke M, Waack S. A novel hybrid gene prediction method  
37 employing protein multiple sequence alignments. *Bioinformatics*. 2011;27(6):757-63.  
38 doi:10.1093/bioinformatics/btr010.

39  
40  
41 18. Majoros WH, Pertea M, Salzberg SL. TigrScan and GlimmerHMM: two open  
42 source ab initio eukaryotic gene-finders. *Bioinformatics*. 2004;20(16):2878-9.  
43 doi:10.1093/bioinformatics/bth315.

44  
45  
46 19. Kent WJ. BLAT--the BLAST-like alignment tool. *Genome research*.  
47 2002;12(4):656-64. doi:10.1101/gr.229202. Article published online before March  
48 2002.

49  
50  
51 20. Birney E, Clamp M, Durbin R. GeneWise and Genomewise. *Genome research*.  
52 2004;14(5):988-95. doi:10.1101/gr.1865504.

53  
54  
55 21. Elsik CG, Mackey AJ, Reese JT, Milshina NV, Roos DS, Weinstock GM. Creating  
56  
57  
58  
59  
60  
61  
62  
63  
64  
65

1 a honey bee consensus gene set. *Genome biology*. 2007;8(1):R13. doi:10.1186/gb-  
2 2007-8-1-r13.

3  
4 22. Trapnell C, Pachter L, Salzberg SL. TopHat: discovering splice junctions with  
5 RNA-Seq. *Bioinformatics*. 2009;25(9):1105-11. doi:10.1093/bioinformatics/btp120.

6  
7 23. Trapnell C, Roberts A, Goff L, Pertea G, Kim D, Kelley DR et al. Differential gene  
8 and transcript expression analysis of RNA-seq experiments with TopHat and Cufflinks.  
9 *Nature protocols*. 2012;7(3):562-78. doi:10.1038/nprot.2012.016.

10  
11 24. Bairoch A, Apweiler R. The SWISS-PROT protein sequence database and its  
12 supplement TrEMBL in 2000. *Nucleic acids research*. 2000;28(1):45-8.

13  
14 25. Kanehisa M, Goto S, Sato Y, Kawashima M, Furumichi M, Tanabe M. Data,  
15 information, knowledge and principle: back to metabolism in KEGG. *Nucleic acids*  
16 *research*. 2014;42(Database issue):D199-205. doi:10.1093/nar/gkt1076.

17  
18 26. Kanehisa M, Goto S. KEGG: kyoto encyclopedia of genes and genomes. *Nucleic*  
19 *acids research*. 2000;28(1):27-30.

20  
21 27. Jones P, Binns D, Chang HY, Fraser M, Li W, McAnulla C et al. InterProScan 5:  
22 genome-scale protein function classification. *Bioinformatics*. 2014;30(9):1236-40.  
23 doi:10.1093/bioinformatics/btu031.

24  
25 28. Zdobnov EM, Apweiler R. InterProScan--an integration platform for the signature-  
26 recognition methods in InterPro. *Bioinformatics*. 2001;17(9):847-8.

27  
28 29. Simao FA, Waterhouse RM, Ioannidis P, Kriventseva EV, Zdobnov EM. BUSCO:  
29 assessing genome assembly and annotation completeness with single-copy orthologs.  
30 *Bioinformatics*. 2015;31(19):3210-2. doi:10.1093/bioinformatics/btv351.

31  
32  
33  
34  
35  
36  
37  
38  
39  
40  
41  
42  
43  
44  
45  
46  
47  
48  
49  
50  
51  
52  
53  
54  
55  
56  
57  
58  
59  
60  
61  
62  
63  
64  
65

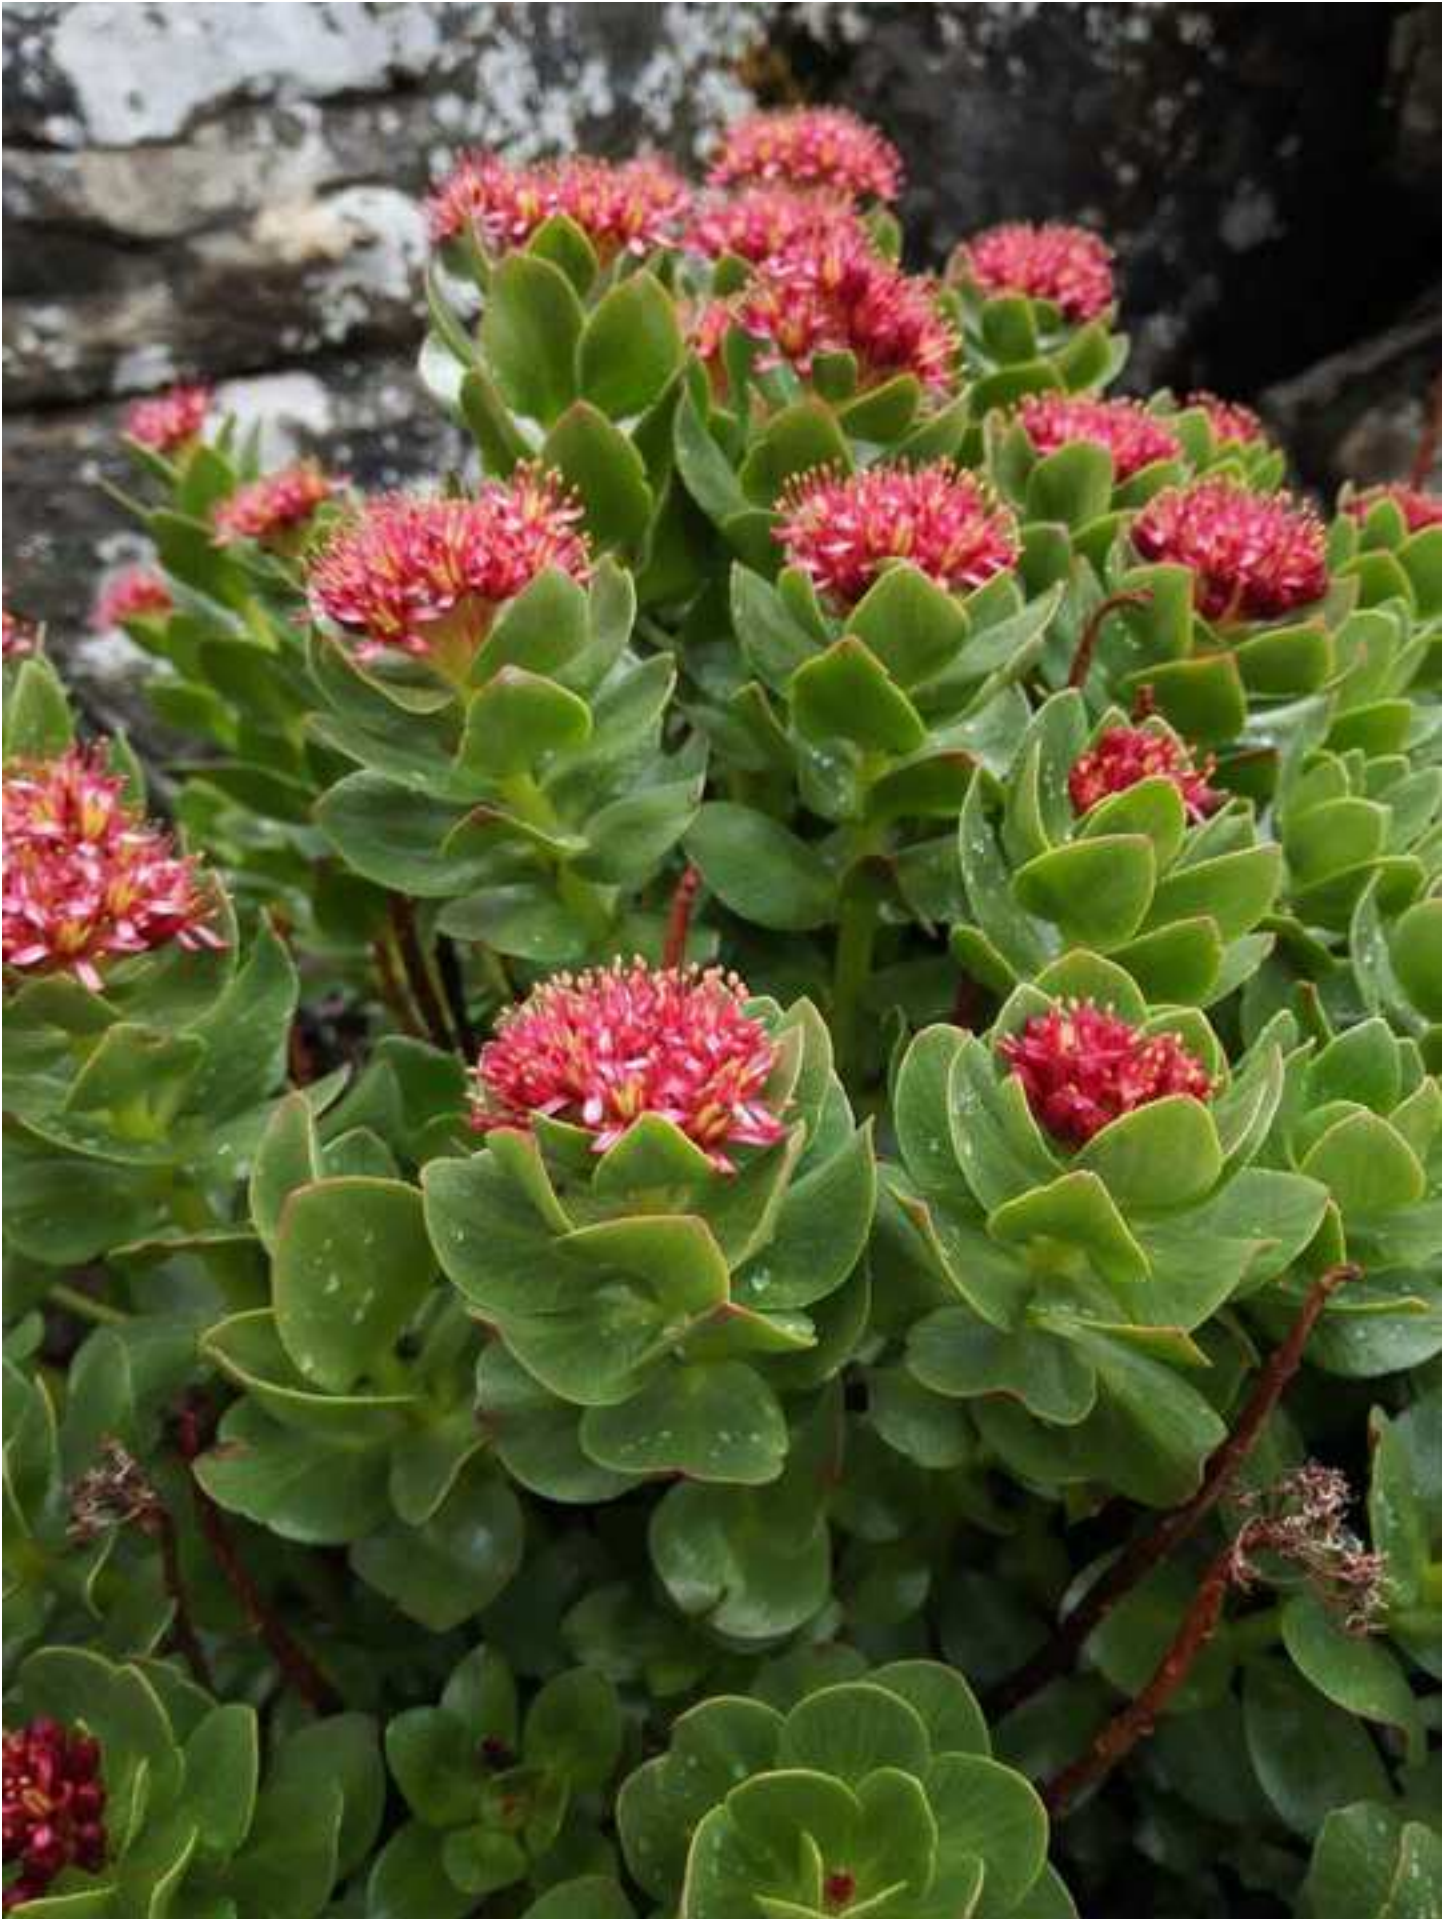

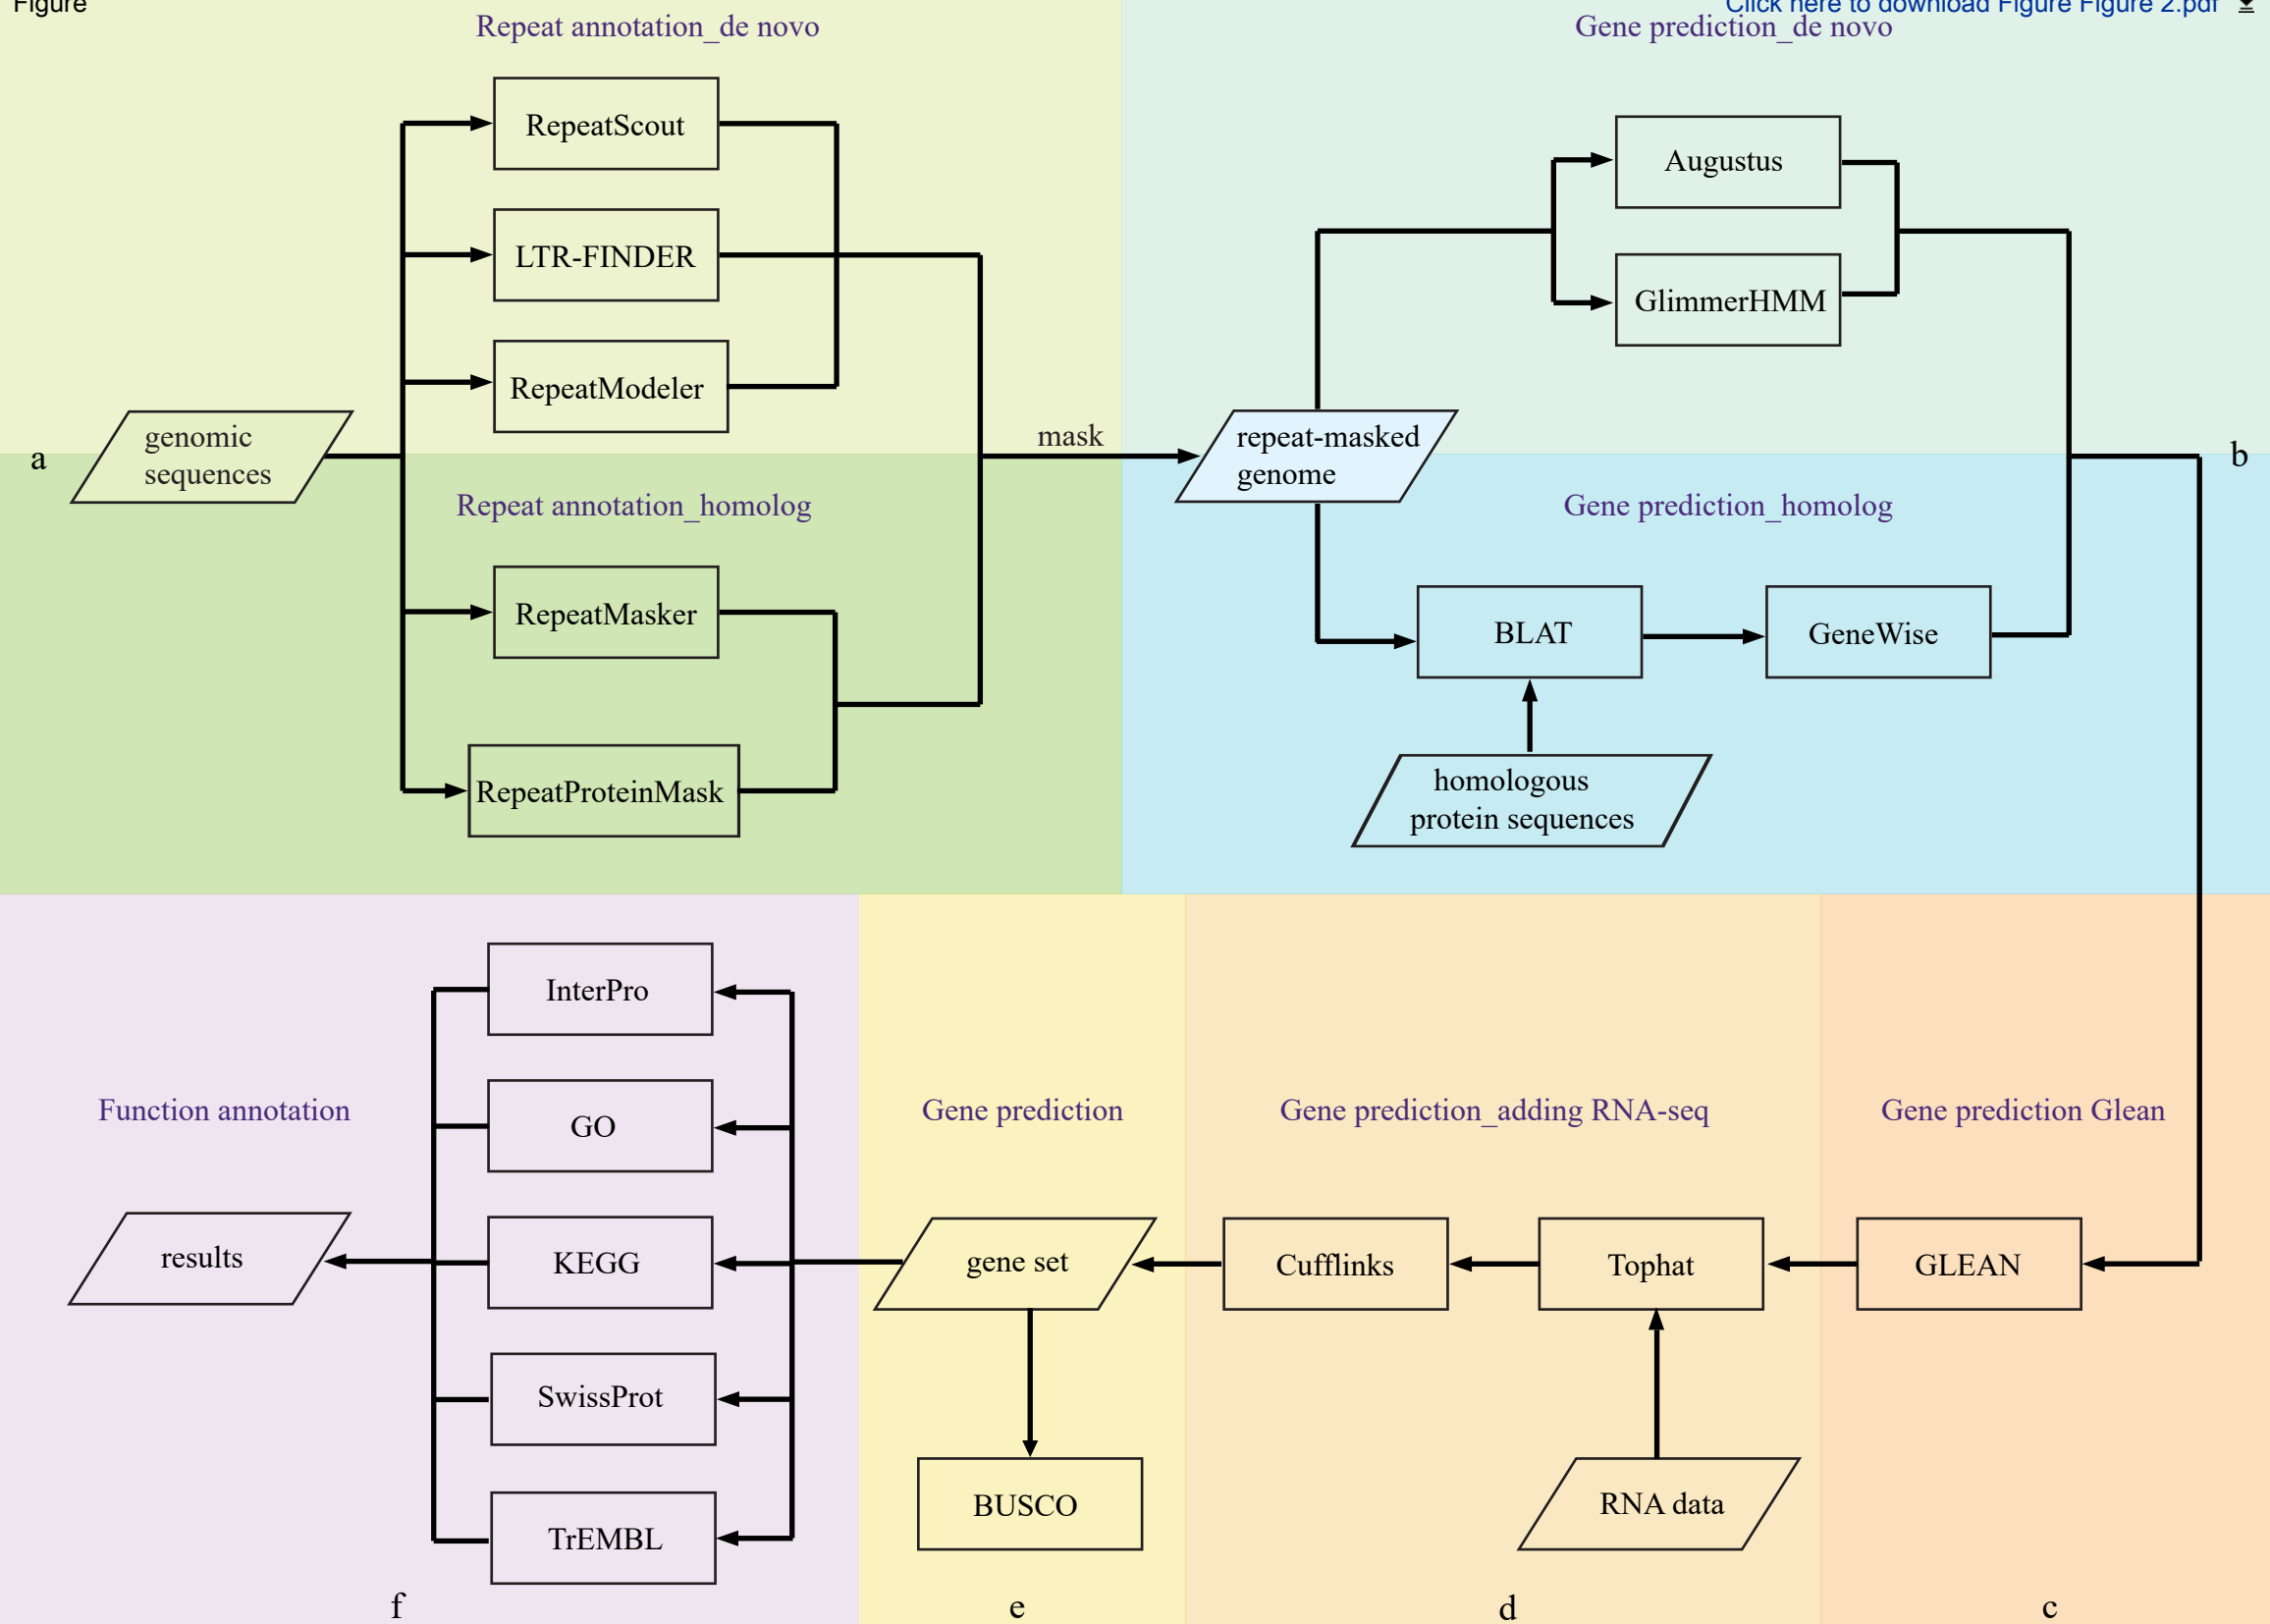

Figure

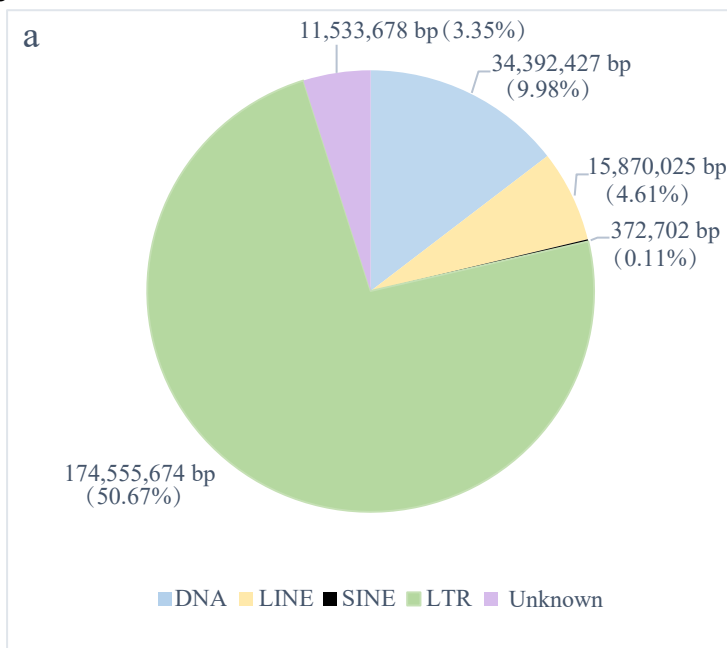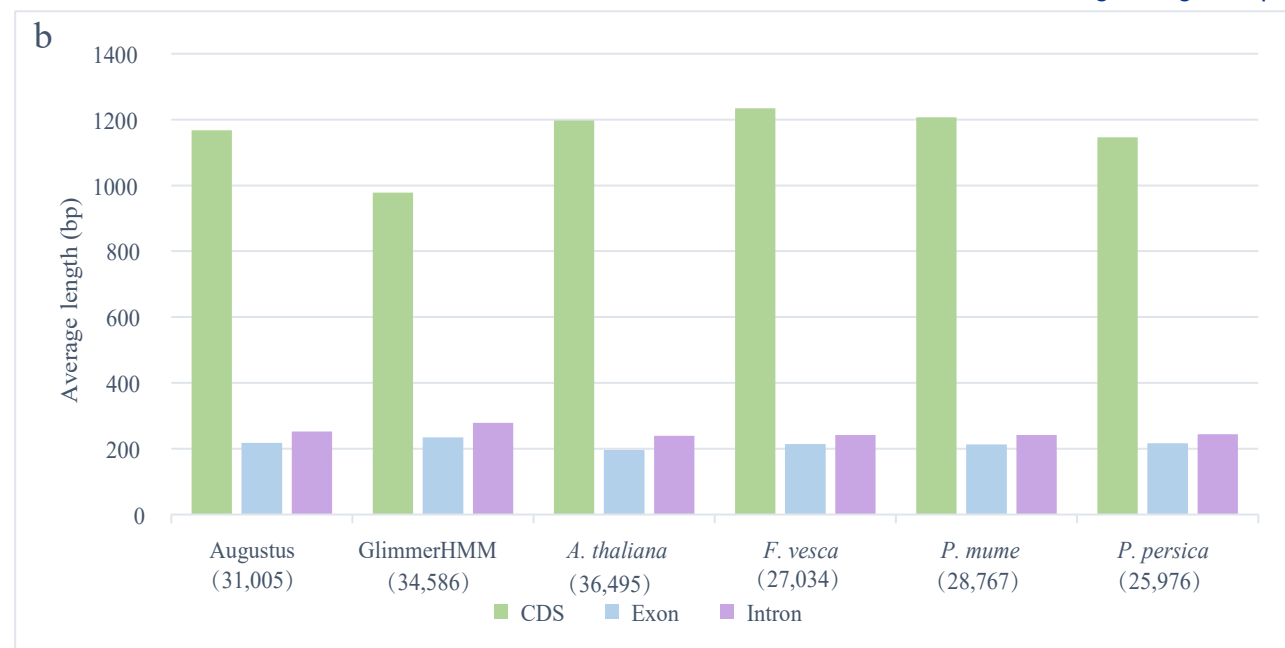



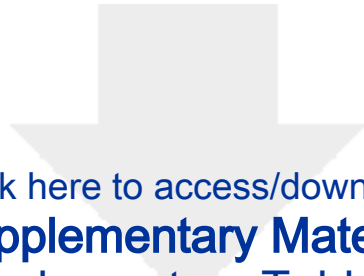

[Click here to access/download](#)

**Supplementary Material**

[Additional file1\\_Supplementary Tables and Figures.docx](#)

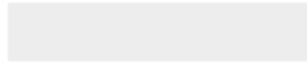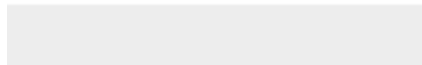

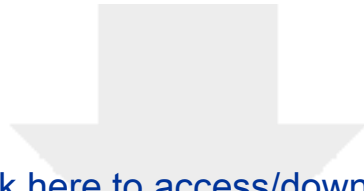

Click here to access/download  
**Supplementary Material**  
Additional file 2\_Protocols.io.xlsx

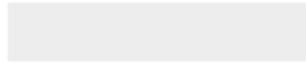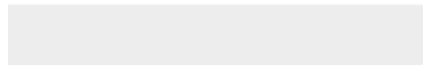

Dear Editor,

Please find enclosed our manuscript entitled “*Draft genome of the Tibetan medicinal herb, Rhodiola crenulata*”, which we wish to submit for publication as a DataNote in *GigaScience*. All co-authors have approved the final version of this manuscript and there is no financial interest or other conflict to declare. We certify that the submission is original work and is not under review with another journal.

*Rhodiola crenulata*, one of the well-known Tibetan medicinal herb, is mainly grown in high-altitude regions of Tibet, Yunnan and Sichuan provinces in China. In the past few years, increasing published studies on pharmacological activities of *R. crenulata*, have strengthened our understanding into its active ingredient composition, pharmacological activity and mechanism of action. The findings also provided strong evidences supporting the important medicinal and economical values of *R. crenulata*. Meanwhile, some *Rhodiola* species are becoming endangered because of overexploitation and environmental destruction. However, little is known about the genetic and genomic information of any *Rhodiola* species. Here, we sequenced and assembled the genome sequences of *R. crenulata*, which is also the first sequenced species in family *Crassulaceae*. A total of 162.08 Gb (~380X) raw sequence reads were generated and 344.5 Mb (containing 25.7 Mb Ns) of assembly genome, representing for 82% of the estimated genome size, with the contig and scaffold N50 length of 25.4 kb and 144.7 kb, respectively, was obtained. We also provided a detailed assessment of the genome completeness, and carried out transposable element, protein-coding genes prediction for the genome assembly. The predicted genes were also functionally annotated.

We believe that the *R. crenulata* genome that we have sequenced, assembled and annotated here, would serve as an important resource for comparative genomic study and also further investigation of the adaptability of *Rhodiola* species in extreme

environment and the biosynthesis pathways of pharmacologically active metabolites in *Rhodiola* species.

I hope you will find our study of interest and look forward to hearing from you.

Sincerely yours,

Xin Liu, PhD

liuxin@genomics.cn

BGI-Shenzhen, Shenzhen, 518083, China
